# Supplementary material
Source: PubMed Central journal article supplement (PMC4572864)
Supplement: cdd2014206x2.pdf [file cdd2014206x2.pdf]

**Table S2 Differential gene expression profile with miR34 over-expression**

| PROBE_ID                                        | GENE SYMBOL   | Fold changes | ACCESSION      | PROTEIN_PRODUCT | Comment                              |
|-------------------------------------------------|---------------|--------------|----------------|-----------------|--------------------------------------|
| <b>Up-regulation by miR-34a over-expression</b> |               |              |                |                 |                                      |
| ILMN_1221148                                    | CNN1          | 5.622138271  | NM_009922.3    | NP_034052.2     | h1-calponin                          |
| ILMN_2595612                                    | Idh2          | 4.273697206  | NM_173011.1    | NP_766599.1     |                                      |
| ILMN_1244099                                    | LOC100041388  | 4.014480491  | XM_001476627.1 | XP_001476677.1  |                                      |
| ILMN_2636803                                    | Acyp2         | 4.003017615  | NM_029344.3    | NP_083620.1     |                                      |
| ILMN_1249378                                    | Bhlhb2        | 3.909017089  | NM_011498.4    | NP_035628.1     |                                      |
| ILMN_1239370                                    | Shfm1         | 3.745368624  | NM_009169.2    | NP_033195.1     |                                      |
| ILMN_2764781                                    | Pls3          | 3.615617528  | NM_145629.1    | NP_663604.1     |                                      |
| ILMN_2971043                                    | V1rd6         | 3.5419975    | NM_030738.1    | NP_109663.1     |                                      |
| ILMN_2695964                                    | Lep           | 3.440290865  | NM_008493.3    | NP_032519.1     |                                      |
| ILMN_2641111                                    | Dpagt1        | 3.275815373  | NM_007875.2    | NP_031901.2     |                                      |
| ILMN_2671366                                    | 6330577E15Rik | 3.117077402  | NM_026377.1    |                 |                                      |
| ILMN_2599130                                    | Aldoa         | 3.109562032  | NM_007438.3    | NP_031464.1     |                                      |
| ILMN_2777986                                    | Pck1          | 3.074604817  | NM_011044      |                 |                                      |
| ILMN_1225414                                    | Rab5c         | 2.914454097  | NM_024456.2    | NP_077776.2     |                                      |
| ILMN_2462745                                    | H2-D1         | 2.798198849  | NM_010380.3    | NP_034510.3     |                                      |
| ILMN_2732848                                    | TAGLN2        | 2.721118525  | NM_178598.2    | NP_848713.1     | SM22alpha                            |
| ILMN_1245987                                    | Hnrnpk        | 2.667151752  | NM_025279.2    | NP_079555.1     |                                      |
| ILMN_2654296                                    | Rab10         | 2.617282273  | NM_016676.4    | NP_057885.1     |                                      |
| ILMN_2716838                                    | Hspa4         | 2.350300909  | NM_008300.3    | NP_032326.3     |                                      |
| ILMN_2691613                                    | Ugcg          | 2.334163401  | NM_031868.2    | NP_114074.1     |                                      |
| ILMN_2511089                                    | Ppp1ca        | 2.300596168  | NM_011673      |                 |                                      |
| ILMN_2747959                                    | Dcn           | 2.195035137  | NM_007833.4    | NP_031859.1     |                                      |
| ILMN_2607408                                    | Pcbp4         | 2.178358316  | NM_021567.2    | NP_067542.2     |                                      |
| ILMN_2873319                                    | Lypla1        | 2.173443856  | NM_008866.2    | NP_032892.1     |                                      |
| ILMN_2710354                                    | ACTA2         | 2.1729868    | NM_007392.2    | NP_031418.1     | SM $\alpha$ -actin                   |
| ILMN_2849521                                    | Pycr1         | 2.169303834  | NM_144795.2    | NP_659044.1     |                                      |
| ILMN_1218842                                    | LOC381105     | 2.160453784  | XM_355021.1    |                 |                                      |
| ILMN_2418957                                    | 5930418K15Rik | 2.146499883  |                |                 |                                      |
| ILMN_1254883                                    | Fip1l1        | 2.143354544  | NM_024183.4    | NP_077145.2     |                                      |
| ILMN_2873822                                    | AEBP1         | 2.079588497  | NM_009636.1    | NP_033766.1     | aortic carboxypeptidase-like protein |

|              |               |             |                |                |                                     |
|--------------|---------------|-------------|----------------|----------------|-------------------------------------|
| ILMN_2643159 | SIRT1         | 2.051813061 | NM_019812.1    | NP_062786.1    | sirtuin 1                           |
| ILMN_2978040 | Myh8          | 2.028195488 | NM_177369.3    | NP_796343.2    |                                     |
| ILMN_2876071 | Fth1          | 2.020825185 | NM_010239.1    | NP_034369.1    |                                     |
| ILMN_2621581 | SMTN          | 1.980577874 | NM_013870.2    | NP_038898.1    | smoothelin                          |
| ILMN_1231072 | A630082K20Rik | 1.958463745 | XM_145254      |                |                                     |
| ILMN_1218247 | Palld         | 1.916824434 | XM_974900.1    | XP_979994.1    |                                     |
| ILMN_2988299 | SRF           | 1.91038159  | NM_020493.1    | NP_065239.1    | Serum response factor               |
| ILMN_1227803 | LOC674707     | 1.860780338 | XR_031381.1    |                |                                     |
| ILMN_2836982 | DES           | 1.821677099 | NM_010043.1    | NP_034173.1    | desmin                              |
| ILMN_2435360 | MYOCD         | 1.820363166 | NM_145136.4    | NP_660118.3    | myocardium                          |
| ILMN_2691780 | MyI3          | 1.786516369 | NM_010859.1    | NP_034989.1    |                                     |
| ILMN_2804261 | CALD1         | 1.780141459 | NM_145575.2    | NP_663550.1    | h-caldesmon                         |
| ILMN_2936221 | Uprt          | 1.772344129 | NM_001081189.1 | NP_001074658.1 |                                     |
| ILMN_2758452 | Hn1           | 1.75919755  | NM_008258.1    | NP_032284.1    |                                     |
| ILMN_1218347 | MYLK          | 1.744983995 | NM_139300.3    | NP_647461.3    | telokin                             |
| ILMN_2679063 | Dctn2         | 1.735718025 | NM_027151.1    | NP_081427.1    |                                     |
| ILMN_2622217 | MYH11         | 1.723761875 | NM_013607.1    | NP_038635.1    | smooth muscle myosin heavy chain 11 |
| ILMN_1214950 | MEF2C         | 1.719307738 | NM_025282.2    | NP_079558.1    | myocyte enhancer factor 2C          |
| ILMN_2533447 | AA407270      | 1.71203639  | NM_001033208.3 | NP_001028380.1 |                                     |
| ILMN_2518457 | Irak1         | 1.708525698 | NM_008363.2    | NP_032389.2    |                                     |
| ILMN_2643326 | 2210020M01Rik | 1.685217224 | NM_183259.2    | NP_899082.1    |                                     |
| ILMN_2699222 | LOC669053     | 1.6652632   | XM_972773.1    | XP_977867.1    |                                     |
| ILMN_1230140 | LOC385923     | 1.659273047 | XM_359000.1    |                |                                     |
| ILMN_3133448 | Mfge8         | 1.650499233 | NM_001045489.1 | NP_001038954.1 |                                     |
| ILMN_2694955 | Igfbp4        | 1.611891845 | NM_010517.2    |                |                                     |
| ILMN_1221235 | 4933425L21Rik | 1.606305557 | AK019858       |                |                                     |
| ILMN_1235646 | 1110069O07Rik | 1.587316809 |                |                |                                     |
| ILMN_1234729 | C130017I15Rik | 1.582996786 | AK047868       |                |                                     |
| ILMN_2513536 | Ythdf3        | 1.576358155 | NM_172677.2    | NP_766265.2    |                                     |
| ILMN_1227357 | Flot2         | 1.573381621 | NM_008028.2    | NP_032054.1    |                                     |
| ILMN_1241039 | 2510042H12Rik | 1.562091712 | AK011092       |                |                                     |
| ILMN_1239535 | Plekhm2       | 1.560872256 | XM_924800.3    | XP_929893.3    |                                     |
| ILMN_1212702 | Hba-a1        | 1.547253336 | NM_008218.2    | NP_032244.2    |                                     |

|              |           |             |             |             |              |
|--------------|-----------|-------------|-------------|-------------|--------------|
| ILMN_1213431 | LOC626583 | 1.530697304 | XM_988307.1 | XP_993401.1 |              |
| ILMN_2419138 | VCL       | 1.501898958 | NM_009502.4 | NP_033528.3 | metavinculin |

### Down-regulation by miR-34a over-expression

|              |               |             |                |                |  |
|--------------|---------------|-------------|----------------|----------------|--|
| ILMN_3005211 | Akap6         | 0.628808485 | NM_198111.2    | NP_932779.2    |  |
| ILMN_1240938 | AW212394      | 0.602759169 | NM_133829      |                |  |
| ILMN_2684370 | Igk-C         | 0.589605323 | XM_132633.4    |                |  |
| ILMN_1213449 | Man2c1        | 0.588938772 | NM_028636.2    | NP_082912.1    |  |
| ILMN_2653617 | Cd63          | 0.588478696 | NM_007653.1    |                |  |
| ILMN_1253322 | Tex261        | 0.588088929 | NM_009357.1    | NP_033383.1    |  |
| ILMN_1244081 | Rgs4          | 0.582896009 | NM_009062.3    | NP_033088.2    |  |
| ILMN_2744326 | LOC665250     | 0.575666945 | XR_033814.1    |                |  |
| ILMN_1253970 | Sirt7         | 0.575421788 | NM_153056.1    | NP_694696.1    |  |
| ILMN_2791963 | E2f6          | 0.563460644 | NM_033270.1    | NP_150373.1    |  |
| ILMN_2867147 | Tyrobp        | 0.562853185 | NM_011662.2    | NP_035792.1    |  |
| ILMN_2714252 | Kcnj3         | 0.557833702 | NM_008426.1    | NP_032452.1    |  |
| ILMN_1256518 | Akr7a5        | 0.551937352 | NM_025337.2    | NP_079613.2    |  |
| ILMN_2752817 | Myb           | 0.550583451 | NM_010848.3    | NP_034978.3    |  |
| ILMN_2607529 | LOC100046044  | 0.546925564 | XM_001475459.1 | XP_001475509.1 |  |
| ILMN_1233283 | P2rx5         | 0.543051384 | NM_033321.1    | NP_201578.1    |  |
| ILMN_1243319 | Trib2         | 0.54076479  | NM_144551.5    | NP_653134.2    |  |
| ILMN_2626773 | Rbak          | 0.533060729 | NM_021326.2    | NP_067301.1    |  |
| ILMN_1254199 | Gaa           | 0.532515968 | NM_008064.2    | NP_032090.2    |  |
| ILMN_1235366 | LOC100045628  | 0.53117846  | XR_031850.1    |                |  |
| ILMN_2510612 | Ywhaz         | 0.530641568 | NM_011740.2    | NP_035870.1    |  |
| ILMN_2628876 | Jph2          | 0.528423701 | NM_021566.1    | NP_067541.1    |  |
| ILMN_1215067 | Ctbp1         | 0.526071557 | NM_013502.2    | NP_038530.1    |  |
| ILMN_3090793 | Nfyc          | 0.525698077 | NM_008692.3    | NP_032718.2    |  |
| ILMN_2752994 | Fbxo32        | 0.52354856  | NM_026346.1    | NP_080622.1    |  |
| ILMN_2777474 | H2-T23        | 0.519869076 | NM_010398.1    | NP_034528.1    |  |
| ILMN_2457437 | A830080H07Rik | 0.519543217 |                |                |  |
| ILMN_2537836 | LOC385865     | 0.518471833 | XM_358975.1    |                |  |
| ILMN_2927025 | Sdcbp         | 0.517597012 | NM_016807.1    | NP_058087.1    |  |

|              |           |             |                |                |
|--------------|-----------|-------------|----------------|----------------|
| ILMN_1235635 | Slco3a1   | 0.513386835 | NM_023908.2    | NP_076397.2    |
| ILMN_2705268 | Atp5l     | 0.512445091 | NM_013795.4    | NP_038823.2    |
| ILMN_1232295 | Sort1     | 0.509807516 | NM_019972      |                |
| ILMN_1227459 | Gga2      | 0.508942236 | NM_028758.2    | NP_083034.1    |
| ILMN_2425415 | Ube3b     | 0.505632053 | NM_054093.2    | NP_473434.2    |
| ILMN_1239729 | Kif1b     | 0.504351203 | NM_207682.2    | NP_997565.2    |
| ILMN_2620078 | Dap3      | 0.501323496 | NM_022994.2    | NP_075370.1    |
| ILMN_2589073 | Lrrc10    | 0.500021345 | NM_146242.2    | NP_666354.1    |
| ILMN_1227839 | Brwd1     | 0.499482347 | NM_145125.2    | NP_660107.1    |
| ILMN_2599110 | Usp1      | 0.498577121 | NM_001013378.1 | NP_001013396.1 |
| ILMN_1238117 | LOC386054 | 0.493252261 | XM_359045.1    |                |
| ILMN_2986315 | Mir16     | 0.487658501 | NM_019580.3    | NP_062526.1    |
| ILMN_1254987 | Mbnl2     | 0.487128377 | NM_175341.4    | NP_780550.1    |
| ILMN_2750428 | Timm44    | 0.476772184 | NM_011592.1    | NP_035722.1    |
| ILMN_1234324 | Pdzd8     | 0.474702905 | NM_001033222.2 | NP_001028394.1 |
| ILMN_2667447 | Hdlbp     | 0.473999228 | NM_133808.4    | NP_598569.1    |
| ILMN_1259528 | LOC382092 | 0.469147057 | XM_356174.1    |                |
| ILMN_2739843 | Metrn     | 0.467418561 | NM_133719      |                |
| ILMN_2993267 | Keap1     | 0.465161445 | NM_016679.2    | NP_057888.1    |
| ILMN_2971559 | Eef1a2    | 0.465024364 | NM_007906.2    | NP_031932.1    |
| ILMN_1257759 | Tnrc6b    | 0.464889956 | NM_144812.2    | NP_659061.2    |
| ILMN_2733046 | Cdc25c    | 0.455919501 | NM_009860.2    | NP_033990.2    |
| ILMN_1241915 | Notch1    | 0.454971716 | NM_008714.2    | NP_032740.2    |
| ILMN_2609948 | Suds3     | 0.453359029 | NM_178622.3    | NP_848737.2    |
| ILMN_1238313 | Cnot2     | 0.452552762 | NM_001037846.2 | NP_001032935.1 |
| ILMN_1247990 | Purb      | 0.451824808 | NM_011221.2    | NP_035351.1    |
| ILMN_1258682 | Map2k2    | 0.451660818 | NM_023138.3    | NP_075627.2    |
| ILMN_1220309 | Cep63     | 0.451484232 | NM_001081122.1 | NP_001074591.1 |
| ILMN_1247312 | Kpna3     | 0.449438204 | NM_008466.3    | NP_032492.1    |
| ILMN_2628875 | Jph2      | 0.447043915 | NM_021566.1    | NP_067541.1    |
| ILMN_1227926 | Flt1      | 0.445619416 | NM_010228.3    | NP_034358.2    |
| ILMN_1220498 | Pygm      | 0.44414986  | NM_011224.1    | NP_035354.1    |
| ILMN_2655260 | Ptp4a3    | 0.442203662 | NM_008975.2    | NP_033001.2    |

|              |               |             |                |                |
|--------------|---------------|-------------|----------------|----------------|
| ILMN_2930819 | Acd           | 0.437936397 | NM_001012638.1 | NP_001012656.1 |
| ILMN_2675785 | Myo18b        | 0.433358207 | XM_912851.3    | XP_917944.3    |
| ILMN_1221702 | Plaa          | 0.432391343 | NM_172695.2    | NP_766283.2    |
| ILMN_1246601 | Glg1          | 0.431889168 | NM_009149      |                |
| ILMN_2724545 | Sbk           | 0.431232234 | NM_145587.1    |                |
| ILMN_2813594 | Zfp691        | 0.431018251 | NM_183140.1    | NP_898963.1    |
| ILMN_2632665 | Cav1          | 0.430594443 | NM_007616.3    | NP_031642.1    |
| ILMN_2546596 | 2310076E21Rik | 0.429992929 | AK010195       |                |
| ILMN_2656677 | Fkbp8         | 0.429677397 | NM_010223.1    | NP_034353.1    |
| ILMN_2739760 | Prelp         | 0.428983401 | NM_054077.3    | NP_473418.2    |
| ILMN_2499264 | 4933428A15Rik | 0.427856664 | NM_027756      |                |
| ILMN_2529932 | LOC385905     | 0.427319747 | XR_034995.1    |                |
| ILMN_2710784 | Gpsn2         | 0.426685111 | NM_134118.3    | NP_598879.1    |
| ILMN_2618364 | Flnc          | 0.426361591 | NM_001081185.1 | NP_001074654.1 |
| ILMN_2715289 | Exosc7        | 0.425933252 | NM_001081188.1 | NP_001074657.1 |
| ILMN_2693976 | Ncl           | 0.424817135 | NM_010880.3    | NP_035010.3    |
| ILMN_1236828 | Usp20         | 0.422404031 | NM_028846.3    | NP_083122.1    |
| ILMN_1256369 | Lynx1         | 0.419799355 | NM_011838.4    | NP_035968.1    |
| ILMN_1249514 | Large         | 0.415024023 | NM_010687.1    | NP_034817.1    |
| ILMN_1226970 | Wwp2          | 0.40899385  | NM_025830.3    | NP_080106.1    |
| ILMN_2697918 | LOC381302     | 0.408386585 | XM_355244.1    |                |
| ILMN_1255927 | Ubtf          | 0.404891052 | NM_001044383.1 | NP_001037848.1 |
| ILMN_1221168 | 2310061F22Rik | 0.404598175 | NM_153775.1    | NP_722470.1    |
| ILMN_2681030 | EG629595      | 0.402452137 | XM_894495.2    | XP_899588.1    |
| ILMN_1237183 | Ociad1        | 0.381976204 | NM_023429.3    | NP_075918.1    |
| ILMN_2713060 | Fam131a       | 0.369421669 | NM_133778.2    | NP_598539.1    |
| ILMN_2733356 | Endod1        | 0.364638976 | NM_028013.2    | NP_082289.1    |
| ILMN_1252204 | Sepw1         | 0.364105606 | NM_009156.2    | NP_033182.1    |
| ILMN_1250816 | Apeh          | 0.363210275 | NM_146226.1    | NP_666338.1    |
| ILMN_1244098 | Dst           | 0.359134991 | NM_134448.2    | NP_604443.2    |
| ILMN_2445548 | C330006A16Rik | 0.358698462 |                |                |
| ILMN_1231542 | Ttn           | 0.357513978 | NM_011652.3    | NP_035782.3    |
| ILMN_1377923 | Actb          | 0.353220505 | NM_007393.3    | NP_031419.1    |

|              |               |             |                |                |
|--------------|---------------|-------------|----------------|----------------|
| ILMN_1254358 | Igfbp5        | 0.348021168 | NM_010518.2    | NP_034648.2    |
| ILMN_2527650 | LOC268700     | 0.346186618 | XM_193742.2    |                |
| ILMN_3073318 | Tom1l2        | 0.346158034 | NM_153080.2    | NP_694720.2    |
| ILMN_2654074 | Sesn1         | 0.345735691 | NM_001013370.1 | NP_001013388.1 |
| ILMN_2994779 | Gpsn2         | 0.340700999 | NM_134118.1    | NP_598879.1    |
| ILMN_2480021 | 0610007P22Rik | 0.339814991 | NM_026676.2    | NP_080952.1    |
| ILMN_1232298 | BC003940      | 0.335811448 | NM_001033231.2 | NP_001028403.1 |
| ILMN_1377918 | LOC100048105  | 0.335515669 | XM_001479832.1 | XP_001479882.1 |
| ILMN_2611699 | Jmjd1b        | 0.335403769 | NM_001081256.1 | NP_001074725.1 |
| ILMN_2661005 | 1110018G07Rik | 0.326283053 | NM_178065.3    | NP_835166.2    |
| ILMN_2723881 | Hcfc1         | 0.326241686 | NM_008224.3    | NP_032250.2    |
| ILMN_2737658 | Pdk2          | 0.326102669 | NM_133667.1    | NP_598428.1    |
| ILMN_1219978 | Appl2         | 0.325859192 | NM_145220.2    | NP_660255.1    |
| ILMN_3128792 | Ttn           | 0.316510794 | NM_028004.2    | NP_082280.2    |
| ILMN_2704562 | LOC100047628  | 0.316406947 | XM_001476703.1 | XP_001476753.1 |
| ILMN_1244316 | Hbb-b1        | 0.31627096  | AK010993       |                |
| ILMN_2621471 | 1110007L15Rik | 0.31623635  | NM_026269.1    | NP_080545.2    |
| ILMN_1214024 | 2310003M01Rik | 0.315148721 | AK009124       |                |
| ILMN_1224045 | Dsp           | 0.31458421  | XM_621314.3    | XP_621314.2    |
| ILMN_2699028 | Crybg3        | 0.314261164 | NM_174848.2    | NP_777273.1    |
| ILMN_2740852 | F2r           | 0.306318637 | NM_010169.3    | NP_034299.2    |
| ILMN_2670713 | Cyfp2         | 0.305397666 | NM_133769.2    | NP_598530.2    |
| ILMN_2777798 | EG667723      | 0.294813005 | XM_001001948.1 | XP_001001948.1 |
| ILMN_2590961 | Hadh          | 0.294489032 | NM_008212.3    | NP_032238.2    |
| ILMN_1213609 | Txnip         | 0.294044329 | NM_023719.1    | NP_076208.1    |
| ILMN_1246808 | Serpine2      | 0.285704085 | AK045954       |                |
| ILMN_2760295 | BC003965      | 0.284864172 | XM_128528.2    |                |
| ILMN_2762056 | Dtnbp1        | 0.264900509 | NM_025772.3    |                |
| ILMN_2710139 | Ppargc1a      | 0.262055987 | NM_008904.1    | NP_032930.1    |
| ILMN_2625981 | Tcp112        | 0.252211623 | NM_146008.2    | NP_666120.1    |
| ILMN_2591731 | Ptprb         | 0.243202853 | NM_029928.1    | NP_084204.1    |
| ILMN_2636335 | Sfrs2         | 0.239533525 | NM_011358.1    | NP_035488.1    |
| ILMN_2565729 | B230386D16Rik | 0.238450669 | AK046451       |                |

|              |               |             |                |                |
|--------------|---------------|-------------|----------------|----------------|
| ILMN_2607880 | Tkt           | 0.236974973 | NM_009388.2    | NP_033414.1    |
| ILMN_2771991 | Ndrg2         | 0.236307041 | NM_013864      |                |
| ILMN_2538355 | LOC386233     | 0.226558057 | XM_359128.1    |                |
| ILMN_2588056 | LOC100042427  | 0.22620383  | XM_001478518.1 | XP_001478568.1 |
| ILMN_2593694 | Lrtm1         | 0.225907269 | NM_176920.3    | NP_795894.1    |
| ILMN_2635082 | LOC620009     | 0.223555458 | XR_030609.1    |                |
| ILMN_2747168 | Ddx5          | 0.214385503 | NM_007840.3    | NP_031866.2    |
| ILMN_2762863 | AI606181      | 0.213847123 | XR_035118.1    |                |
| ILMN_2788673 | Pgm2          | 0.213514628 | NM_028132.2    | NP_082408.2    |
| ILMN_2806676 | Acads         | 0.205321587 | NM_007383.2    | NP_031409.2    |
| ILMN_2918987 | Lias          | 0.203012732 | NM_024471.2    | NP_077791.1    |
| ILMN_1249486 | Mgl1          | 0.194652521 | NM_010796.2    | NP_034926.1    |
| ILMN_3144820 | LOC329575     | 0.194506015 | NM_001024849.1 | NP_001020020.1 |
| ILMN_2712957 | Prpf6         | 0.194453201 | NM_133701.2    | NP_598462.1    |
| ILMN_2673024 | Mrps24        | 0.192982414 | NM_026080.2    | NP_080356.1    |
| ILMN_1219840 | 2310033F14Rik | 0.18445462  |                |                |
| ILMN_1237061 | Dm15          | 0.183702219 | NM_032418      |                |
| ILMN_2764727 | Actn2         | 0.174128023 | NM_033268.2    |                |
| ILMN_1236904 | Mrpl23        | 0.164063753 | NM_011288.1    | NP_035418.1    |
| ILMN_1215942 | LOC381095     | 0.152240283 | XM_358506.1    |                |
| ILMN_1239040 | mtDNA_CytB    | 0.112099942 |                |                |
